# Supplementary material for: Association of Early-Term and Full-Term Delivery With Overweight and Obesity Risk in the First Year of Life
Source: Research Square preprint supplement (doi:10.21203/rs.3.rs-6207604/v1), 2025-03-17
Supplement: Supplementary file 1 [file 86d29a7077d28187d40aa98b.docx]

eTable 1. Comparison of the characteristics between the covariates missing group and the intact group.

|  |  | Missing covariates | Included in primary analysis | P Valuea |
| --- | --- | --- | --- | --- |
|  |  |
| **Variable** | | n=1823 | n=5092 |
| **Maternal** | |  |  |  |
| Mode of delivery | |  |  | <.001 |
|  | Vaginal delivery | 1101(60.4) | 2717(53.4) |  |
|  | Cesarean delivery | 703(38.6) | 2375(46.6) |  |
|  | Missing | 19(1.0) | 0 |  |
| Maternal age at delivery,  mean (SD) [range], y | | 30.80(4.31) [20-46] | 29.83(3.66) [20-46] | <.001 |
|  | Missing | 361(19.8) | 0 |  |
| Parity | |  |  | <.001 |
|  | 0 | 906(49.7) | 4506(88.5) |  |
|  | ≥1 | 245(13.4) | 586(11.5) |  |
|  | Missing | 672(36.9) | 0 |  |
| Number of fetuses | |  |  | <.001 |
|  | Single birth | 1182(64.8) | 4725(92.8) |  |
|  | Multiple births | 209(11.5) | 367(7.2) |  |
|  | Missing | 432(23.7) | 0 |  |
| **Infant** | |  |  |  |
| Gestational age | |  |  | .559 |
|  | Early-term infants | 498(27.3) | 1355(26.6) |  |
|  | Full-term infants | 1325(72.7) | 3737(73.4) |  |
|  | Missing | 0 | 0 |  |
| Sex | |  |  | .658 |
|  | Male | 983(53.9) | 2715(53.3) |  |
|  | Female | 840(46.1) | 2377(46.7) |  |
|  | Missing | 0 | 0 |  |
| Feeding practices during the first 6 mo | |  |  | <.001 |
|  | Exclusive breastfeeding | 249(13.7) | 1304(25.6) |  |
|  | Mixed feeding | 423(23.2) | 3303(64.9) |  |
|  | Exclusive formula feeding | 81(4.4) | 485(9.5) |  |
|  | Missing | 1070(58.7) | 0 |  |
| Birth weight | |  |  | .189 |
|  | Low Birth Weight | 16(0.9) | 48(0.9) |  |
|  | normal | 1365(74.9) | 4570(89.7) |  |
|  | Macrosomia | 117(6.4) | 474(9.3) |  |
|  | Missing | 325(17.8) | 0 |  |

a χ2 test was used for categorical variables and 1-factor analysis of variance was used for continuous variables.

eTable 2. Univariate binary Logistic regression (including covariates) analysis table.

eTable 3. Multivariate binary Logistic regression (including covariates) analysis table.

eTable 4. Sensitivity analysis: association between gestational age and risk of overweight and obesity in 4570 normal-weight infants
